# Supplementary material
Source: Research Square preprint supplement (doi:10.21203/rs.3.rs-9253134/v1)
Supplement: Supplementary file 1 [file 4750de9fa8a1691c75f1dd55.docx]

**Statistical optimization and ecotoxicological validation of a hydrolytic detoxification pathway for carbofuran using earthworm gut-associated *Bacillus paralicheniformis* PPH2**

Journal: **Biodegradation**

Puspendu Shita, Harekrishna Janab, Partha Pratim Chakravortya*, Priyanka Sarangic, Payel Surb, Samiran Sona Gaurid and Yuji Sakaie

aDepartment of Zoology, Debra Thana Sahid Kshudiram Smriti Mahavidyalaya (Autonomous), Paschim Medinipur-721124, West Bengal, India

bDepartment of Microbiology, Raja Narendra Lal Khan Women’s College (Autonomous), Paschim Medinipur-721102, West Bengal, India

cDepartment of Zoology, Raja Narendra Lal Khan Women’s College (Autonomous), Paschim Medinipur-721102, West Bengal, India

dCentral Research Facility, Indian Institute of Technology, Kharagpur, West Bengal-721302, India

eDepartment of Environmental Chemistry and Chemical Engineering, Kogakuin University, Tokyo, Japan

***Corresponding author:** Dr. Partha Pratim Chakravorty

Email: [parthapratimchakravorty@yahoo.in](mailto:parthapratimchakravorty@yahoo.in)

**Supplementary Information**


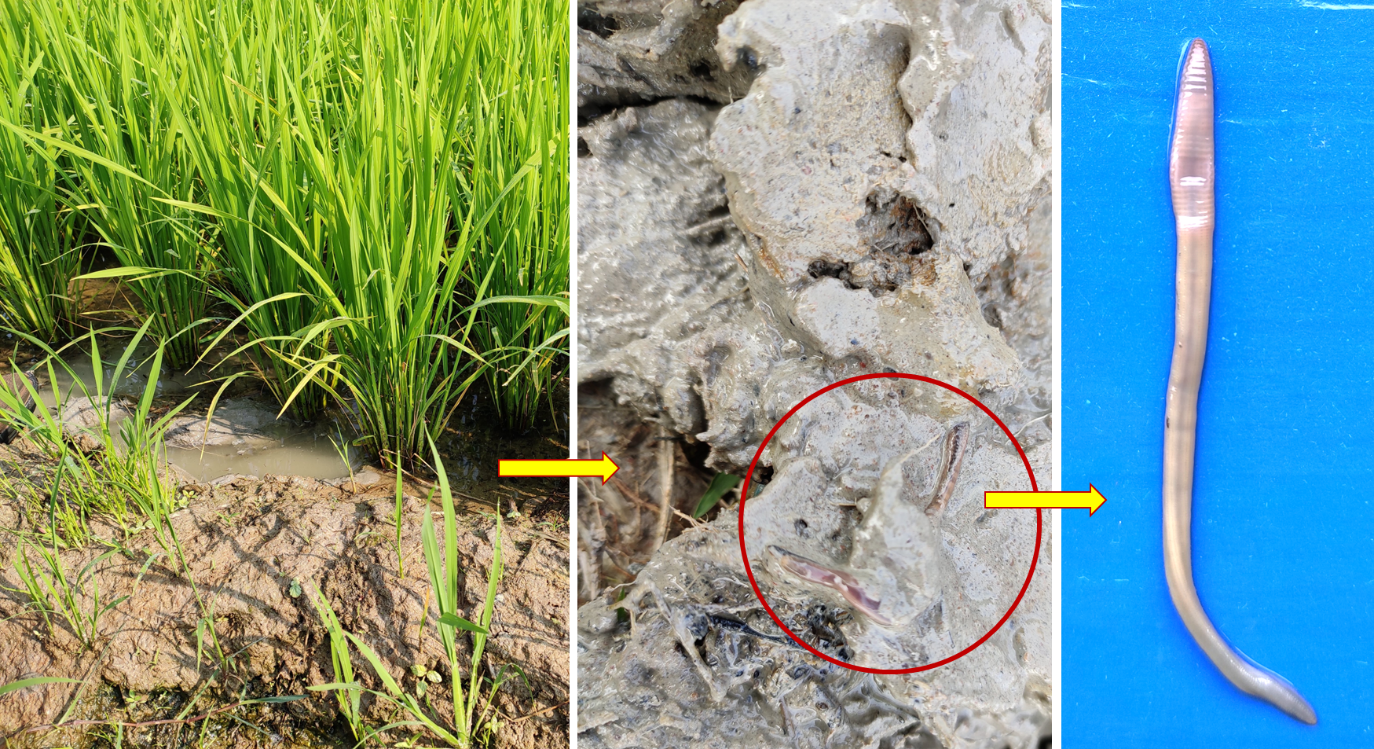


**Fig. S1 Photographic Record of earthworm collection.** Photos showing the collection of *Glyphidrilus* sp. from a submerged paddy field and earthworm morphology.


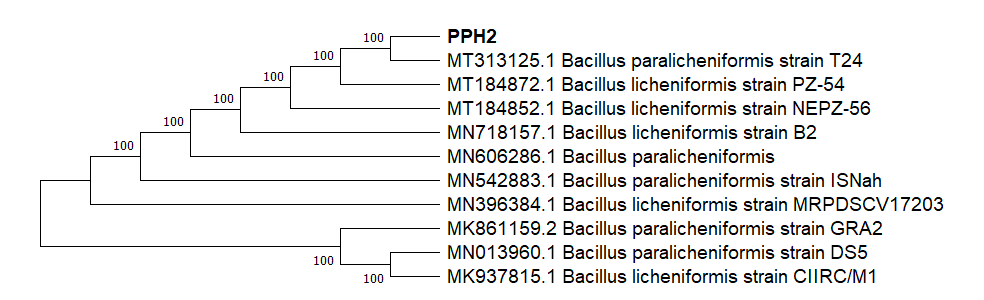


**Fig. S2 Phylogenetic Tree of *B. paralicheniformis* PPH2.** A neighbor-joining tree based on 16S rRNA gene sequences showing PPH2 and its closest relatives.


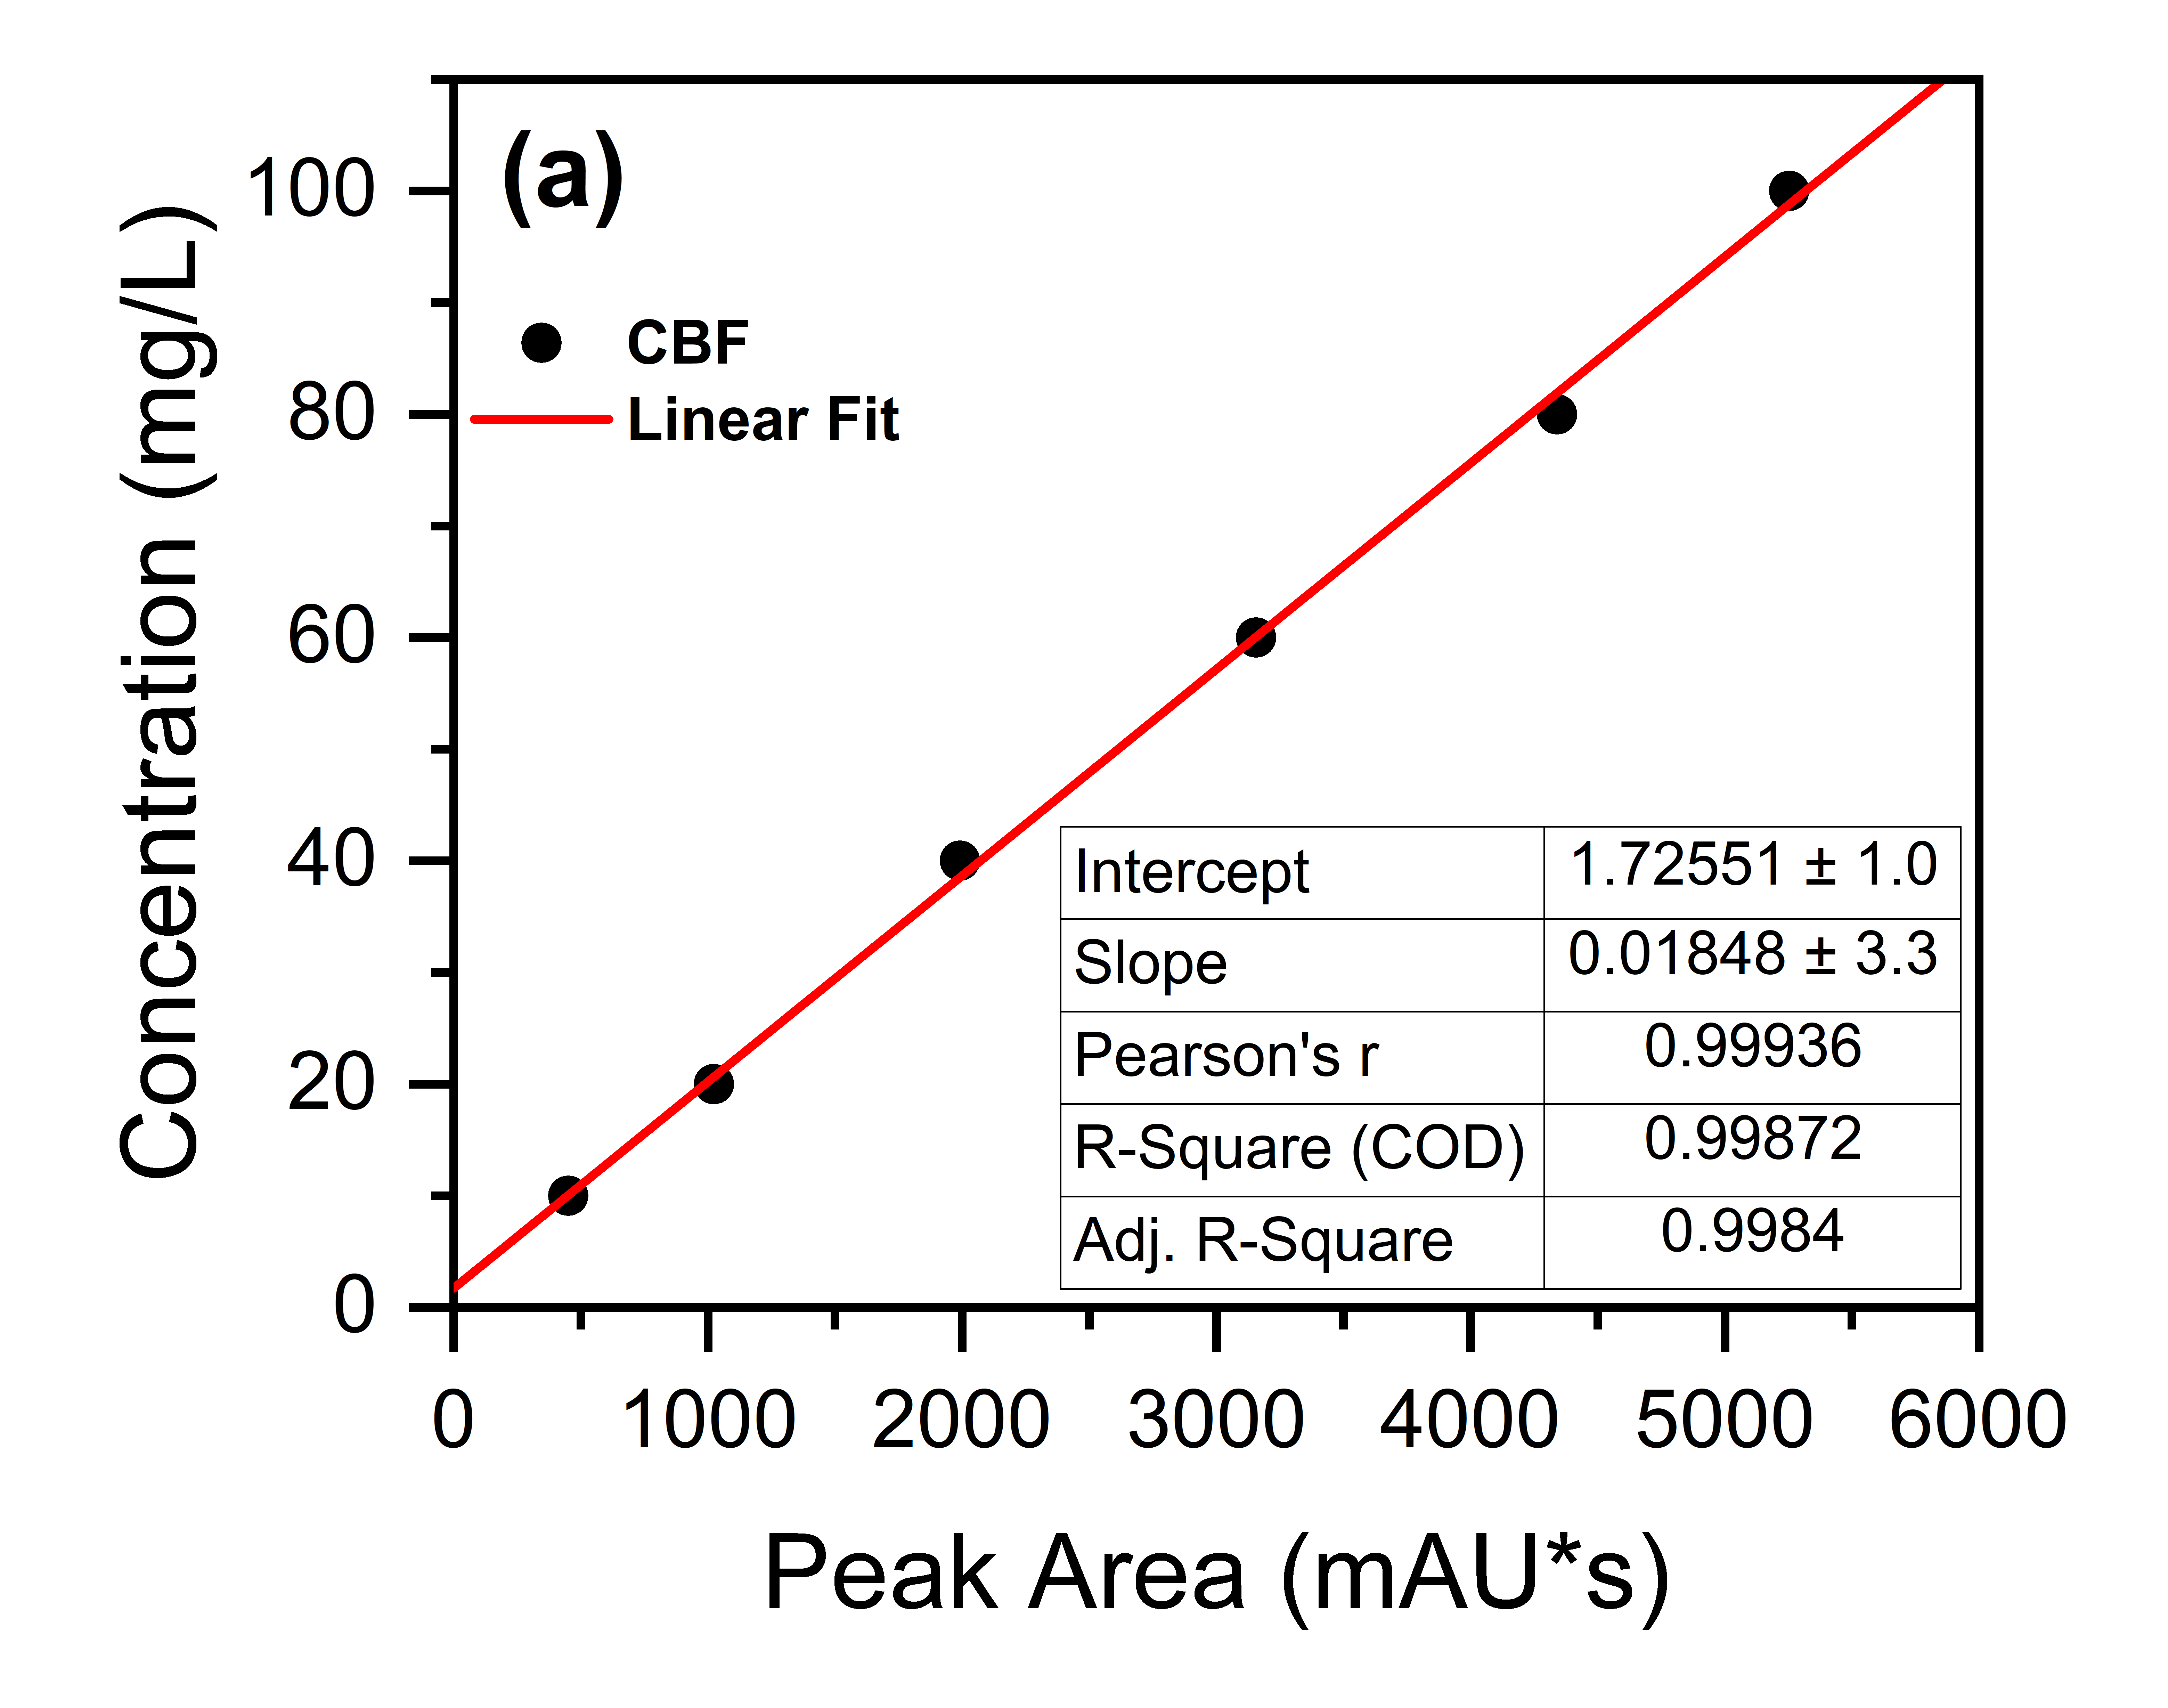


**Fig. S3 HPLC Calibration Curve.** The linear regression plot for carbofuran at different concentrations.


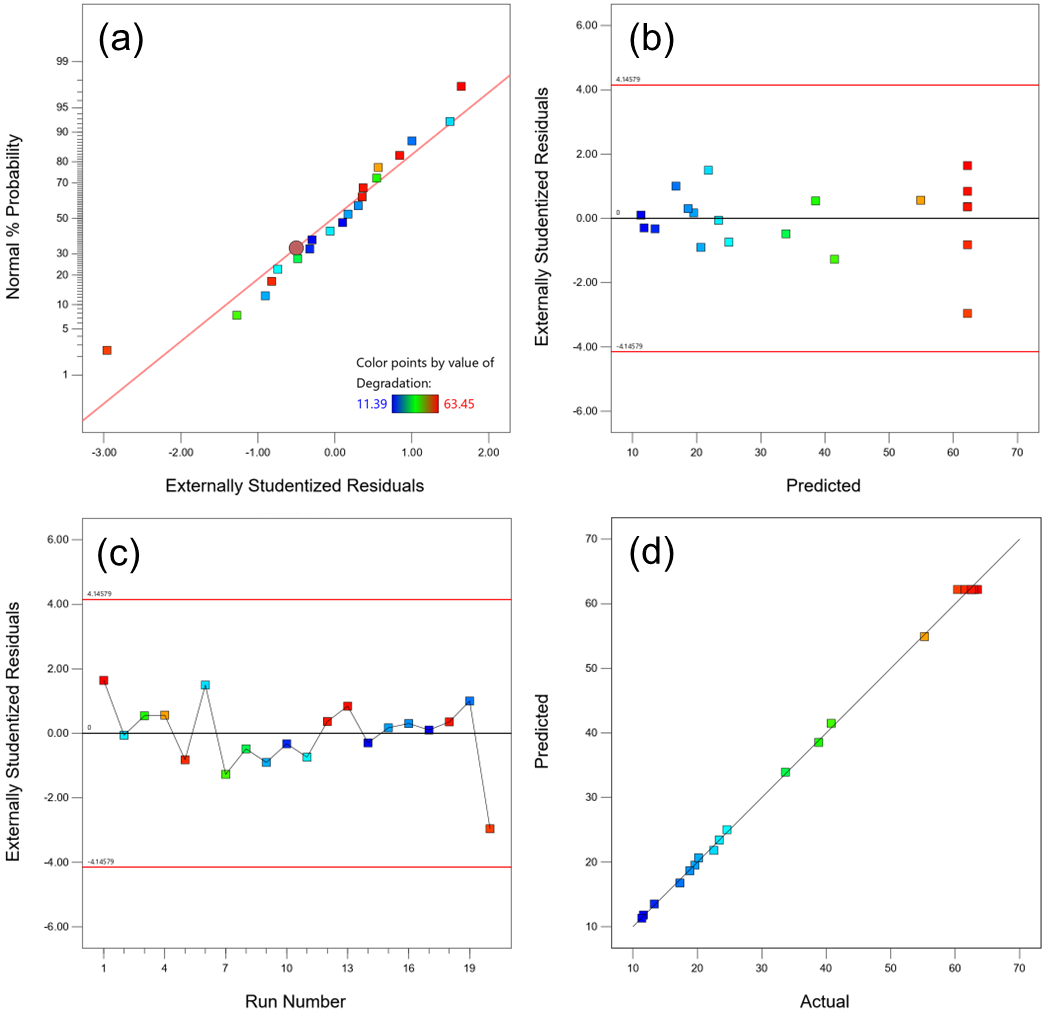
**Fig. S4 RSM Diagnostic Plots.** A four-panel plot showing (a) Normal probability of residuals, (b) Residuals vs. Predicted values, (c) Residuals vs. Run, and (d) Predicted vs. Actual values.
